# Supplementary material for: Fluorescent calix[4]arene chemosensor for acidic and basic amino acids in pure aqueous media
Source: Royal Society of Chemistry journal article supplement (doi:10.1039/c4ra04074k), 2014-01-01
Supplement: c4ra04074k1.pdf [file c4ra04074k1.pdf]

Electronic Supplementary Material for

# Fluorescent calix[4]arene chemosensor for acidic and basic amino acids in pure aqueous media

Yao-Wei Xu<sup>a</sup>, Li-Lin Tan<sup>a</sup>, Jun-Min Liu<sup>\*a</sup>, Li-Min Xiao<sup>c</sup>, Shao-Yong Li<sup>b</sup>, Cheng-Yong Su<sup>\*a</sup>

<sup>a</sup> MOE Laboratory of Bioinorganic and Synthetic Chemistry/KLGHEI of Environment and Energy Chemistry, State Key Laboratory of Optoelectronic Materials and Technologies, School of Chemistry and Chemical Engineering, Sun Yat-Sen University, Guangzhou 510275, China. E-mail: liujunm@mail.sysu.edu.cn, cessey@mail.sysu.edu.cn

<sup>b</sup> Tianjin Key Laboratory on Technologies Enabling Development of Clinical Therapeutics and Diagnostics (Theranostics), School of Pharmacy, Basic Medical Research Center, Tianjin Medical University, Tianjin 300070, China.

## Table of Contents

|                                       |     |
|---------------------------------------|-----|
| 1. Apparatus and reagents             | S2  |
| 2. Synthesis of <b>2</b> and <b>3</b> | S2  |
| 3. Figure S1                          | S2  |
| 4. Figure S2                          | S3  |
| 5. Figure S3                          | S4  |
| 6. Figure S4                          | S4  |
| 7. Figure S5                          | S5  |
| 8. Table S1                           | S6  |
| 9. Table S2                           | S9  |
| 10. Table S3                          | S12 |
| 11. Table S4                          | S15 |
| 12. Table S5                          | S18 |
| 13. Table S6                          | S21 |
| 14. Table S7                          | S21 |

## 1. Apparatus and reagents

All reactions were carried out under anhydrous conditions in dry solvents, using argon or nitrogen and monitored by thin-layer chromatography (TLC) using silica gel plates from Merck (60F254). Fluorescence spectra were recorded on a Shimadzu RF-5301PC spectrometer. UV-Vis spectra were recorded on a Shimadzu UV-2450 spectrometer. MALDI-TOF MS was run on a Bruker Daltonics ultrafleXtreme MALDI-TOF/TOF mass spectrometer. ESI-MS data were obtained using a JEOL The AccuTOF CS JMS-T100CS mass spectrometer. NMR spectra were recorded on a Bruker Ascend 400 MHz or Varian Mercury Plus 300 MHz nuclear magnetic resonance spectroscopy. Chemical shifts of NMR are given in ppm relative to tetramethylsilane. Elemental analyses were carried out with a Vario EL Element Analyzer. A Delta 320 pH-meter [Mettler-Toledo Instruments (Shanghai) Co., China] was used for pH measurements. All of naturally occurring amino acids were of analytical grade and used without further purification.

## 2. Synthesis of 2 and 3

### 2.1 Synthesis of 3

**4** (200 mg, 0.21 mmol), 5'-formyl-2,2'-bithiophene-5-boronic acid (400 mg, 1.68 mmol), Pd(dppf)Cl<sub>2</sub> (77 mg, 0.11 mmol), K<sub>2</sub>CO<sub>3</sub> (580 mg, 4.2 mmol) was added to a flask under nitrogen atmosphere, and then toluene (8 mL) and methanol (8 mL) was added. The reaction mixture was stirred at room temperature for about 15 min and then refluxed at 80 °C. After completion of the reaction as monitored by TLC, the mixture was cooled and evaporated to dryness. The residue was dissolved in dichloromethane and the organic content was washed with water and brine. The combined organic extracts were subsequently dried over anhydrous MgSO<sub>4</sub>, filtered and evaporated to afford a crude product which was further purified by silica-gel column chromatography using petroleum ether and ethyl acetate as the eluant (2:1, v/v) to yield 220 mg yellow solid. Yield: 75%. <sup>1</sup>H-NMR (400 MHz, CDCl<sub>3</sub>) δ (ppm): 9.75 (s, 4H), 7.51 (d, *J* = 3.9 Hz, 4H), 7.04 (d, *J* = 3.8 Hz, 8H), 6.94 (s, 8H), 6.81 (d, *J* = 3.6 Hz, 4H), 4.50 (d, *J* = 13.3 Hz, 4H), 3.96 (t, *J* = 7.3 Hz, 8H), 3.25 (d, *J* = 13.5 Hz, 4H), 2.01-1.86 (m, 8H), 1.51-1.42 (m, 8H), 1.03 (t, *J* = 7.3 Hz, 12H); <sup>13</sup>C-NMR (100 MHz, CDCl<sub>3</sub>) δ (ppm): 182.2, 157.1, 147.5, 146.5, 141.1, 137.4, 135.5, 134.0, 127.8, 127.0, 125.9, 123.5, 123.1, 75.4, 32.5, 31.3, 19.6, 14.3; MALDI-TOF: *m/z* 1416.300 ([M]<sup>+</sup>); 1439.292 ([M+Na]<sup>+</sup>); 1455.259 ([M+K]<sup>+</sup>); Elemental Analysis: Calcd for C<sub>80</sub>H<sub>72</sub>O<sub>8</sub>S<sub>8</sub>: C, 67.76; H, 5.12. Found: C, 67.72; H, 5.15.

### 2.2 Synthesis of 2

A mixture of **3** (142 mg, 0.10 mmol) and cyanoacetic acid (102 mg, 1.2 mmol) was added acetonitrile (60 mL) and toluene (20 mL) under nitrogen atmosphere, and then piperidine (1.9 g, 22.5 mmol) was added. The reaction solution was refluxed at 90 °C for 5 h. After cooling to room temperature, the resulting mixture was neutralized to pH 2-3 with 0.5 M aqueous HCl and extracted with dichloromethane. The extract was washed successively with water and brine and dried over anhydrous MgSO<sub>4</sub>, filtered and evaporated to afford a crude product which was further purified by silica-gel column chromatography using ethyl acetate and acetic acid as the eluant (1:1, v/v) to yield 157 mg yellow solid. Yield: 93%. <sup>1</sup>H-NMR (400 MHz, DMF-*d*<sub>7</sub>) δ (ppm): 8.36 (s, 4H), 7.81 (d, *J* = 4.4 Hz, 4H), 7.36 (d, *J* = 3.8 Hz, 4H), 7.30 (d, *J* = 4.0 Hz, 4H), 7.24 (s, 8H), 7.13 (d, *J* = 3.9 Hz, 4H), 4.56 (d, *J* = 13.1 Hz, 4H), 4.18-3.96 (m, 8H), 3.52 (d, *J* = 13.5 Hz, 4H), 2.13-1.89 (m, 8H), 1.70-1.47 (m, 8H), 1.09 (t, *J* = 7.3 Hz, 12H); <sup>13</sup>C-NMR (100 MHz, DMSO-*d*<sub>6</sub>) δ (ppm): 163.3, 156.5, 145.9, 145.8, 140.8, 135.0, 133.2, 132.8, 127.7, 126.7, 125.4, 123.9, 123.5, 116.3, 97.2, 74.5, 31.8, 29.0, 22.1, 18.9, 13.9; MALDI-TOF: *m/z* 1684.310 ([M]<sup>+</sup>); 1707.302 ([M+Na]<sup>+</sup>); 1723.270 ([M+K]<sup>+</sup>); Elemental Analysis: Calcd for C<sub>92</sub>H<sub>76</sub>N<sub>4</sub>O<sub>12</sub>S<sub>8</sub>: C, 65.53; H, 4.54; N, 3.32. Found: C, 65.52; H, 4.51; N, 3.35.

3.

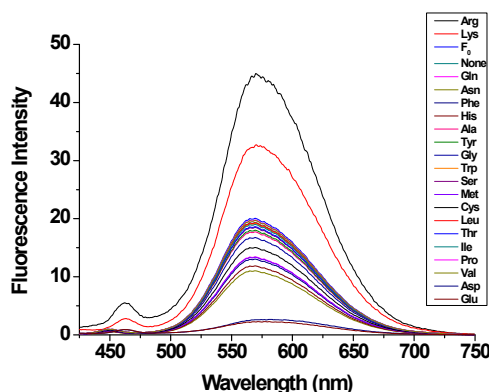

**Figure S1.** The change of fluorescence intensity of **2** with 10 equiv. of amino acids in sodium phosphate buffer solution (0.1 M, pH 7.8),  $\lambda_{\text{ex}} = 400 \text{ nm}$ ,  $[\mathbf{2}] = 5.0 \times 10^{-6} \text{ M}$ ,  $[\text{Glu}] = [\text{Asp}] = [\text{Val}] = [\text{Pro}] = [\text{Ile}] = [\text{Thr}] = [\text{Leu}] = [\text{Cys}] = [\text{Met}] = [\text{Ser}] = [\text{Trp}] = [\text{Gly}] = [\text{Tyr}] = [\text{Ala}] = [\text{His}] = [\text{Phe}] = [\text{Asn}] = [\text{Gln}] = [\text{Lys}] = [\text{Arg}] = 0.02 \text{ M}$ .

4.

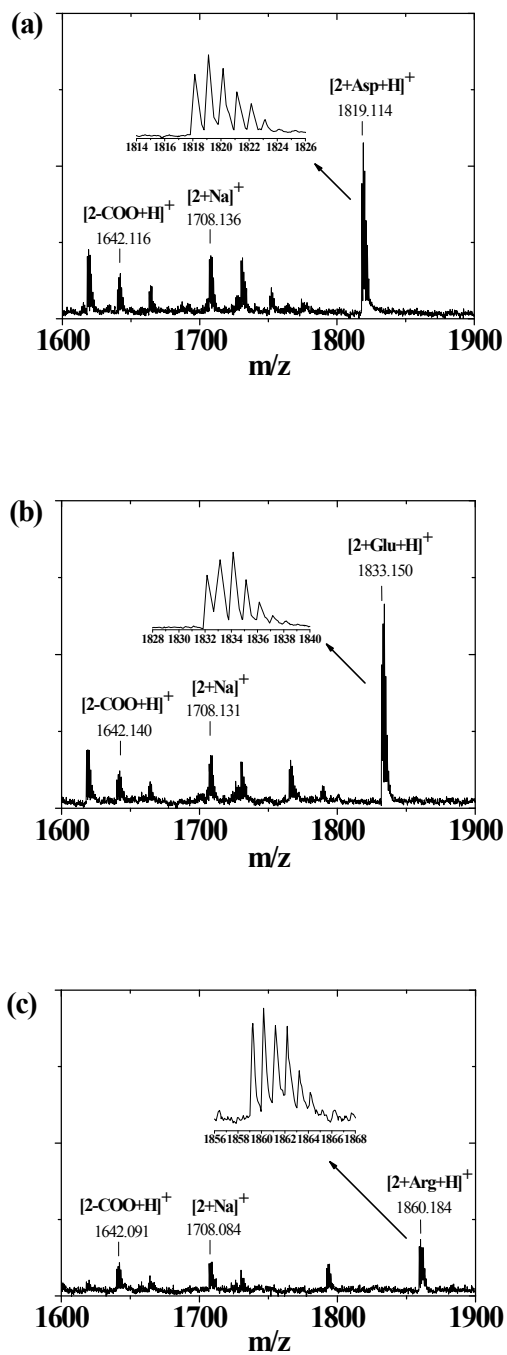

**Figure S2.** ESI MS spectra of (a) **2** and Asp, (b) **2** and Glu, and (c) **2** and Arg in 1 : 1 molar ratio.

5.

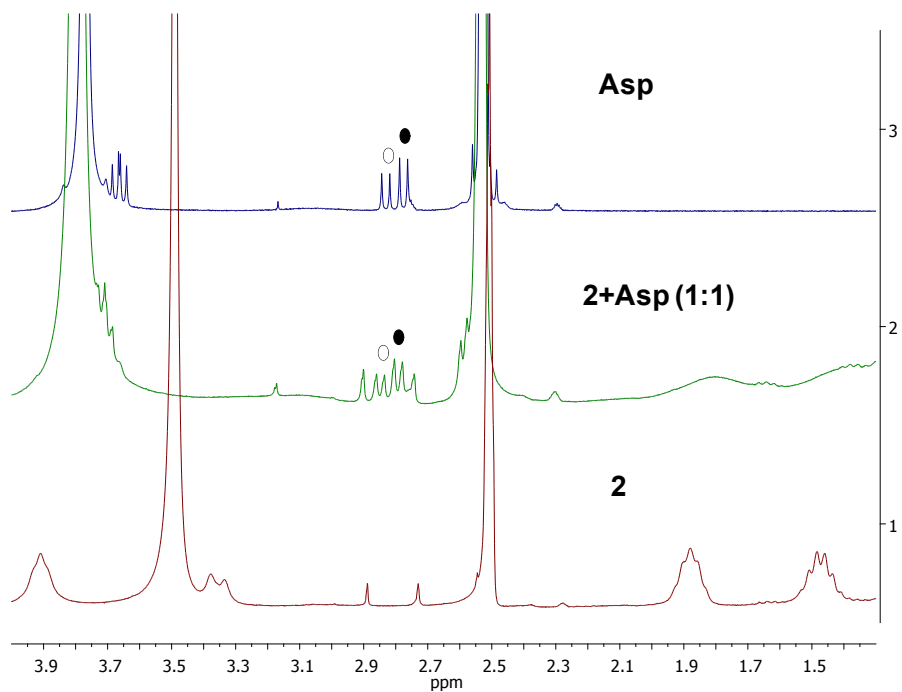

**Figure S3.** Partial <sup>1</sup>H NMR spectra of **2**, Asp, and a 1 : 1 mixture of **2** and Asp in DMSO-*d*<sub>6</sub>/D<sub>2</sub>O.

6.

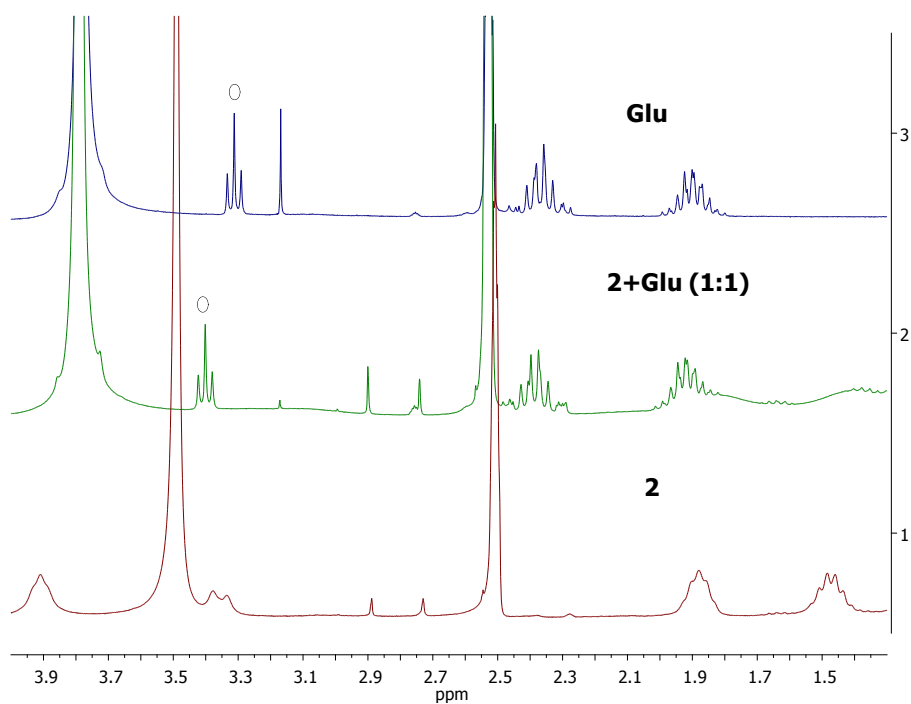

**Figure S4.** Partial <sup>1</sup>H NMR spectra of **2**, Glu, and a 1 : 1 mixture of **2** and Glu in DMSO-*d*<sub>6</sub>/D<sub>2</sub>O.

7.

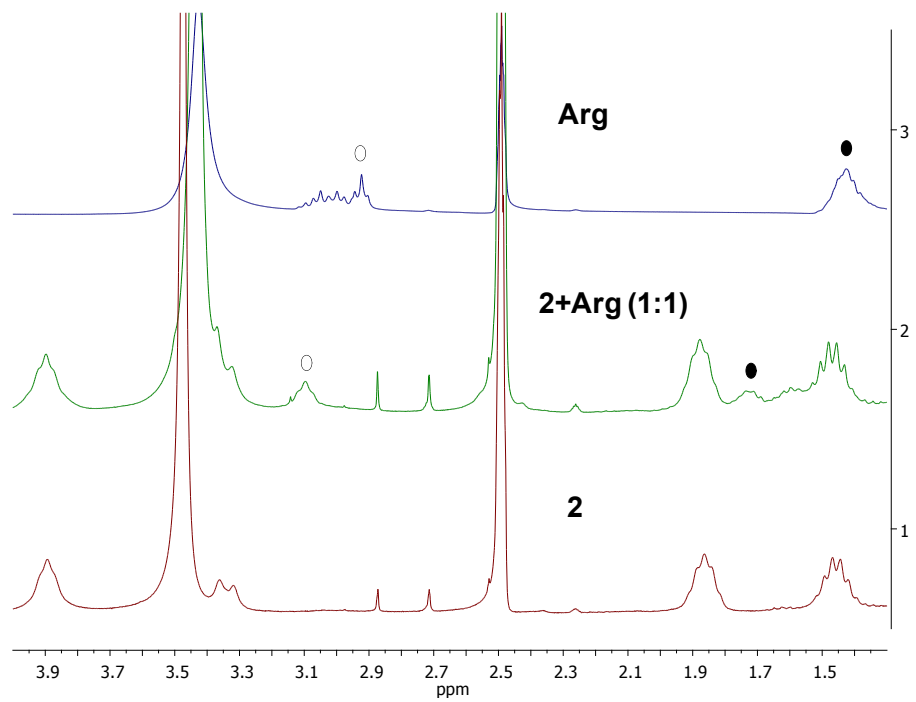

**Figure S5.** Partial <sup>1</sup>H NMR spectra of **2**, Arg, and a 1 : 1 mixture of **2** and Arg in DMSO-*d*<sub>6</sub>/D<sub>2</sub>O.

8.

**Table S1** Cartesian coordinates of **2** from B3LYP/6-31G optimization.

| atom  | x       | y       | z       | atom  | x       | y        | z       |
|-------|---------|---------|---------|-------|---------|----------|---------|
| O(1)  | -2.8428 | -4.5346 | 0.4320  | C(39) | -3.0404 | -7.6164  | 4.2078  |
| O(2)  | 0.3271  | -6.1338 | -0.2754 | C(40) | -3.5551 | -9.0596  | 4.3272  |
| C(3)  | -0.7459 | -4.2471 | 2.7514  | C(41) | 0.6710  | -7.5739  | -0.3644 |
| O(4)  | -2.0161 | -5.4651 | -2.8695 | C(42) | -0.5560 | -8.3958  | -0.0074 |
| C(5)  | -6.3856 | -0.1532 | 0.9082  | C(43) | -0.2790 | -9.9109  | -0.0650 |
| C(6)  | 3.8716  | -3.9153 | -0.7336 | C(44) | -1.5136 | -10.7510 | 0.2987  |
| C(7)  | 3.3914  | -4.2525 | 0.5476  | C(45) | -3.2927 | -5.9202  | 0.1346  |
| C(8)  | 2.1753  | -4.9223 | 0.7251  | C(46) | -4.7312 | -6.2298  | 0.5482  |
| C(9)  | 0.6092  | -3.9900 | 2.4555  | C(47) | -5.0969 | -7.6971  | 0.2453  |
| C(10) | 1.0388  | -2.6606 | 2.4027  | C(48) | -6.5392 | -8.0454  | 0.6464  |
| C(11) | 0.1559  | -1.5841 | 2.6192  | C(49) | -2.4585 | -5.7747  | -4.2505 |
| C(12) | -1.2074 | -1.8797 | 2.8023  | C(50) | -2.9088 | -7.2276  | -4.2978 |
| C(13) | -1.6767 | -3.1940 | 2.8582  | C(51) | -1.7759 | -8.2460  | -4.0814 |
| C(14) | -0.6765 | -1.4737 | -2.5866 | C(52) | -2.2669 | -9.7009  | -4.1423 |
| C(15) | 0.2328  | -2.5314 | -2.7660 | C(53) | 1.9476  | 0.2421   | 2.7960  |
| C(16) | -0.1806 | -3.8667 | -2.8043 | C(54) | 2.0911  | 1.6543   | 2.8149  |
| C(17) | 0.8630  | -4.9866 | -2.8782 | C(55) | 0.9116  | 2.3583   | 2.6791  |
| C(18) | 0.6544  | -0.2123 | 2.6417  | S(56) | -0.4853 | 1.2003   | 2.4957  |
| C(19) | 5.1662  | -3.2691 | -0.9244 | S(57) | 5.9767  | -2.3731  | 0.4385  |
| C(20) | -0.2466 | -0.0789 | -2.6228 | C(58) | 7.3842  | -1.9713  | -0.6515 |
| C(21) | -2.0282 | -1.7986 | -2.3540 | C(59) | 7.1692  | -2.4978  | -1.9091 |
| C(22) | 1.4530  | -5.3054 | -0.4213 | C(60) | 5.9507  | -3.2123  | -2.0567 |
| C(23) | -5.1813 | -1.8313 | -0.5102 | S(61) | -6.8356 | 0.8944   | -0.5130 |
| O(24) | -1.1810 | -5.5766 | 2.9353  | C(62) | -7.9183 | 1.8998   | 0.5586  |
| C(25) | -1.5571 | -4.1411 | -2.6951 | C(63) | -7.8733 | 1.4202   | 1.8523  |
| C(26) | -2.4824 | -3.1184 | -2.3980 | C(64) | -7.0328 | 0.2921   | 2.0422  |
| C(27) | -3.9388 | -3.4277 | -2.0489 | S(65) | 1.5108  | 0.3644   | -2.4545 |
| C(28) | -4.3107 | -2.9161 | -0.6623 | C(66) | 1.0958  | 2.1272   | -2.6693 |
| C(29) | 1.5851  | -5.1238 | 2.1150  | C(67) | -0.2675 | 2.2736   | -2.8282 |
| C(30) | 3.0480  | -4.1935 | -1.8461 | C(68) | -1.0036 | 1.0595   | -2.8040 |
| C(31) | 1.8318  | -4.8697 | -1.7073 | C(69) | 0.6838  | 3.7689   | 2.6863  |
| C(32) | -5.4596 | -1.2696 | 0.7526  | C(70) | -0.5045 | 4.4640   | 2.4982  |
| C(33) | -3.1778 | -3.4488 | 2.9701  | C(71) | -0.4022 | 5.8670   | 2.5845  |
| C(34) | -3.7312 | -3.4735 | 0.4959  | C(72) | 0.8770  | 6.3463   | 2.8481  |
| C(35) | -4.8006 | -1.8078 | 1.8807  | S(73) | 2.0418  | 4.9239   | 2.9923  |
| C(36) | -3.9385 | -2.8998 | 1.7689  | C(74) | 1.4531  | 7.6330   | 3.0383  |
| C(37) | -0.9730 | -6.0933 | 4.3084  | C(75) | 0.9544  | 8.9250   | 3.0381  |
| C(38) | -1.5148 | -7.5140 | 4.3780  | C(76) | -0.4370 | 9.3163   | 2.7988  |

| atom   | x        | y       | z       | atom   | x       | y        | z       |
|--------|----------|---------|---------|--------|---------|----------|---------|
| O(77)  | -1.3970  | 8.5653  | 2.5493  | H(118) | 2.0734  | -2.4549  | 2.1531  |
| O(78)  | -0.6102  | 10.6802 | 2.8768  | H(119) | -1.9224 | -1.0701  | 2.9099  |
| C(79)  | 1.8883   | 9.9760  | 3.3032  | H(120) | 1.2890  | -2.3109  | -2.8760 |
| N(80)  | 2.6835   | 10.8105 | 3.5311  | H(121) | 0.3443  | -5.9454  | -2.8624 |
| C(81)  | -8.6561  | 2.9960  | 0.0158  | H(122) | 1.4242  | -4.9198  | -3.8186 |
| S(82)  | -9.7102  | 4.0161  | 1.0744  | H(123) | -2.7314 | -1.0128  | -2.0998 |
| C(83)  | -10.1861 | 5.0482  | -0.3781 | H(124) | -5.6618 | -1.4220  | -1.3942 |
| C(84)  | -9.5392  | 4.5693  | -1.5129 | H(125) | -4.0958 | -4.5062  | -2.1210 |
| C(85)  | -8.7073  | 3.4528  | -1.2956 | H(126) | -4.6064 | -2.9574  | -2.7819 |
| C(86)  | -11.0932 | 6.1094  | -0.1056 | H(127) | 1.0444  | -6.0691  | 2.1674  |
| C(87)  | -11.6932 | 7.0907  | -0.8771 | H(128) | 2.3983  | -5.1542  | 2.8512  |
| C(88)  | -11.5143 | 7.2900  | -2.3174 | H(129) | 3.3518  | -3.8562  | -2.8319 |
| O(89)  | -12.2491 | 8.3564  | -2.7863 | H(130) | -3.3417 | -4.5248  | 3.0575  |
| O(90)  | -10.8032 | 6.6189  | -3.0865 | H(131) | -3.5697 | -2.9762  | 3.8794  |
| C(91)  | -12.5722 | 7.9943  | -0.2004 | H(132) | -4.9537 | -1.3568  | 2.8559  |
| N(92)  | -13.2875 | 8.7157  | 0.3901  | H(133) | 0.1001  | -6.0656  | 4.5373  |
| C(93)  | 2.1285   | 3.1152  | -2.6715 | H(134) | -1.4925 | -5.4328  | 5.0161  |
| S(94)  | 1.7480   | 4.8531  | -2.9970 | H(135) | -1.0128 | -8.1217  | 3.6126  |
| C(95)  | 3.5332   | 5.2843  | -2.8312 | H(136) | -1.2260 | -7.9344  | 5.3528  |
| C(96)  | 4.2594   | 4.1323  | -2.5481 | H(137) | -3.3178 | -7.2001  | 3.2320  |
| C(97)  | 3.4924   | 2.9529  | -2.4626 | H(138) | -3.5297 | -6.9883  | 4.9672  |
| C(98)  | 3.8548   | 6.6565  | -3.0269 | H(139) | -3.3112 | -9.4876  | 5.3077  |
| C(99)  | 5.0328   | 7.3843  | -3.0133 | H(140) | -3.1042 | -9.7051  | 3.5624  |
| C(100) | 6.3744   | 6.8571  | -2.7492 | H(141) | -4.6429 | -9.1066  | 4.2037  |
| O(101) | 6.6816   | 5.6801  | -2.4880 | H(142) | 1.5002  | -7.7802  | 0.3261  |
| O(102) | 7.3368   | 7.8392  | -2.8173 | H(143) | 1.0167  | -7.7918  | -1.3844 |
| C(103) | 4.9279   | 8.7844  | -3.2891 | H(144) | -0.8870 | -8.1105  | 0.9991  |
| N(104) | 4.8016   | 9.9282  | -3.5261 | H(145) | -1.3684 | -8.1378  | -0.6970 |
| C(105) | 8.4908   | -1.2152 | -0.1545 | H(146) | 0.5467  | -10.1600 | 0.6175  |
| S(106) | 9.8714   | -0.7775 | -1.2376 | H(147) | 0.0632  | -10.1831 | -1.0743 |
| C(107) | 10.7023  | 0.0935  | 0.1590  | H(148) | -2.3448 | -10.5473 | -0.3876 |
| C(108) | 9.9095   | -0.0031 | 1.2976  | H(149) | -1.8577 | -10.5248 | 1.3159  |
| C(109) | 8.7058   | -0.7160 | 1.1237  | H(150) | -1.2942 | -11.8234 | 0.2507  |
| C(110) | 11.9566  | 0.6908  | -0.1500 | H(151) | -2.5824 | -6.5192  | 0.7027  |
| C(111) | 12.8847  | 1.4183  | 0.5750  | H(152) | -3.1308 | -6.0992  | -0.9310 |
| C(112) | 14.0539  | 1.8518  | -0.1267 | H(153) | -4.8613 | -6.0347  | 1.6214  |
| N(113) | 15.0001  | 2.1888  | -0.7365 | H(154) | -5.4326 | -5.5686  | 0.0216  |
| C(114) | 12.7838  | 1.7862  | 1.9903  | H(155) | -4.3984 | -8.3637  | 0.7713  |
| O(115) | 13.8707  | 2.5190  | 2.4110  | H(156) | -4.9580 | -7.8912  | -0.8288 |
| O(116) | 11.8607  | 1.5057  | 2.7752  | H(157) | -7.2602 | -7.4136  | 0.1131  |
| H(117) | 3.9870   | -4.0101 | 1.4228  | H(158) | -6.6962 | -7.8945  | 1.7215  |

| atom   | x        | y        | z       |
|--------|----------|----------|---------|
| H(159) | -6.7748  | -9.0907  | 0.4169  |
| H(160) | -3.2775  | -5.0945  | -4.5175 |
| H(161) | -1.6207  | -5.5912  | -4.9364 |
| H(162) | -3.6947  | -7.3786  | -3.5447 |
| H(163) | -3.3765  | -7.4014  | -5.2783 |
| H(164) | -1.3049  | -8.0511  | -3.1103 |
| H(165) | -0.9995  | -8.0875  | -4.8447 |
| H(166) | -2.7216  | -9.9261  | -5.1152 |
| H(167) | -3.0219  | -9.8957  | -3.3701 |
| H(168) | -1.4423  | -10.4062 | -3.9889 |
| H(169) | 2.7880   | -0.4286  | 2.9214  |
| H(170) | 3.0483   | 2.1472   | 2.9376  |
| H(171) | 7.8853   | -2.3833  | -2.7144 |
| H(172) | 5.6707   | -3.7026  | -2.9805 |
| H(173) | -8.4477  | 1.8673   | 2.6551  |
| H(174) | -6.9281  | -0.1999  | 3.0009  |
| H(175) | -0.7332  | 3.2415   | -2.9714 |
| H(176) | -2.0763  | 1.0269   | -2.9465 |
| H(177) | -1.4403  | 3.9563   | 2.2990  |
| H(178) | -1.2324  | 6.5468   | 2.4618  |
| H(179) | 2.5226   | 7.5991   | 3.2364  |
| H(180) | -1.5490  | 10.9080  | 2.7070  |
| H(181) | -9.6863  | 5.0406   | -2.4735 |
| H(182) | -8.1459  | 2.9778   | -2.0907 |
| H(183) | -11.3839 | 6.1667   | 0.9415  |
| H(184) | -12.1051 | 8.4624   | -3.7507 |
| H(185) | 5.3299   | 4.1738   | -2.4112 |
| H(186) | 3.9288   | 1.9851   | -2.2481 |
| H(187) | 2.9854   | 7.2744   | -3.2428 |
| H(188) | 8.2203   | 7.4558   | -2.6311 |
| H(189) | 10.2224  | 0.4451   | 2.2290  |
| H(190) | 7.9958   | -0.8695  | 1.9271  |
| H(191) | 12.2567  | 0.5465   | -1.1861 |
| H(192) | 13.7714  | 2.7506   | 3.3590  |



9.

**Table S2** Cartesian coordinates of the 2-Asp complex from B3LYP/6-31G optimization.

| atom  | x       | y       | z       | atom  | x        | y       | z       |
|-------|---------|---------|---------|-------|----------|---------|---------|
| O(1)  | -5.3662 | -2.7201 | 0.8102  | C(39) | -6.7468  | -4.9141 | 4.9738  |
| O(2)  | -3.4330 | -5.8037 | 0.3885  | C(40) | -7.8289  | -5.9636 | 5.2722  |
| C(3)  | -3.2606 | -3.1663 | 3.0542  | C(41) | -3.8103  | -7.2321 | 0.4999  |
| O(4)  | -5.4064 | -4.3634 | -2.3402 | C(42) | -5.2626  | -7.3180 | 0.9393  |
| C(5)  | -6.3888 | 2.8407  | 0.6093  | C(43) | -5.7497  | -8.7747 | 1.0635  |
| C(6)  | 0.6679  | -5.4659 | -0.5000 | C(44) | -7.2191  | -8.8723 | 1.5034  |
| C(7)  | 0.2083  | -5.3510 | 0.8260  | C(45) | -6.4240  | -3.7604 | 0.6953  |
| C(8)  | -1.1584 | -5.4112 | 1.1364  | C(46) | -7.8081  | -3.3093 | 1.1585  |
| C(9)  | -1.9744 | -3.6294 | 2.7096  | C(47) | -8.8382  | -4.4525 | 1.0531  |
| C(10) | -0.9741 | -2.6836 | 2.4659  | C(48) | -10.2445 | -4.0274 | 1.5044  |
| C(11) | -1.2276 | -1.3015 | 2.5275  | C(49) | -6.0200  | -4.6033 | -3.6680 |
| C(12) | -2.5434 | -0.8756 | 2.7808  | C(50) | -7.1423  | -5.6181 | -3.5008 |
| C(13) | -3.5711 | -1.7896 | 3.0261  | C(51) | -6.6628  | -7.0214 | -3.0902 |
| C(14) | -2.2146 | -1.6090 | -2.5549 | C(52) | -7.8189  | -8.0205 | -2.9280 |
| C(15) | -1.9858 | -2.9942 | -2.6129 | C(53) | 0.9878   | -0.5106 | 1.5198  |
| C(16) | -3.0166 | -3.9282 | -2.4870 | C(54) | 1.9096   | 0.5649  | 1.5870  |
| C(17) | -2.6772 | -5.4217 | -2.3806 | C(55) | 1.5436   | 1.5910  | 2.4366  |
| C(18) | -0.1307 | -0.3641 | 2.3117  | S(56) | -0.0700  | 1.2200  | 3.2046  |
| C(19) | 2.0902  | -5.4099 | -0.8429 | S(57) | 3.2127   | -4.2351 | -0.0110 |
| C(20) | -1.1070 | -0.6659 | -2.6856 | C(58) | 4.5852   | -4.7705 | -1.0941 |
| C(21) | -3.5288 | -1.1670 | -2.3068 | C(59) | 4.1442   | -5.7543 | -1.9544 |
| C(22) | -2.0717 | -5.6208 | 0.0860  | C(60) | 2.7712   | -6.1016 | -1.8165 |
| C(23) | -6.2174 | 0.6184  | -0.5336 | S(61) | -7.1136  | 3.6299  | -0.8660 |
| O(24) | -4.2545 | -4.0925 | 3.4331  | C(62) | -7.0871  | 5.2496  | -0.0267 |
| C(25) | -4.3320 | -3.4466 | -2.3530 | C(63) | -6.5687  | 5.1098  | 1.2452  |
| C(26) | -4.5923 | -2.0686 | -2.1965 | C(64) | -6.1857  | 3.7885  | 1.5922  |
| C(27) | -5.9836 | -1.5572 | -1.8213 | S(65) | 0.5976   | -1.2346 | -2.3835 |
| C(28) | -5.9741 | -0.7592 | -0.5224 | C(66) | 1.2313   | 0.4359  | -2.7433 |
| C(29) | -1.6610 | -5.1213 | 2.5459  | C(67) | 0.1850   | 1.2794  | -3.0503 |
| C(30) | -0.2869 | -5.5749 | -1.5325 | C(68) | -1.1030  | 0.6701  | -3.0168 |
| C(31) | -1.6588 | -5.6167 | -1.2619 | C(69) | 2.2752   | 2.7604  | 2.7992  |
| C(32) | -6.1170 | 1.4079  | 0.6305  | C(70) | 1.8839   | 3.8505  | 3.5728  |
| C(33) | -5.0057 | -1.2839 | 3.1597  | C(71) | 2.8905   | 4.8024  | 3.8193  |
| C(34) | -5.6474 | -1.3682 | 0.7071  | C(72) | 4.1289   | 4.5036  | 3.2522  |
| C(35) | -5.7261 | 0.7707  | 1.8301  | S(73) | 4.0041   | 2.9268  | 2.3072  |
| C(36) | -5.4814 | -0.6019 | 1.8817  | C(74) | 5.4265   | 5.0656  | 3.3065  |
| C(37) | -4.2199 | -4.4535 | 4.8698  | C(75) | 5.9961   | 6.1400  | 3.9771  |
| C(38) | -5.3213 | -5.4680 | 5.1410  | C(76) | 5.2965   | 7.1127  | 4.8107  |

|        |         |         |         |        |          |         |         |
|--------|---------|---------|---------|--------|----------|---------|---------|
| atom   | x       | y       | z       | atom   | x        | y       | z       |
| O(77)  | 4.0741  | 7.1652  | 5.0332  | H(118) | 0.0295   | -3.0224 | 2.2365  |
| O(78)  | 6.1617  | 8.0335  | 5.3636  | H(119) | -2.7780  | 0.1839  | 2.7433  |
| C(79)  | 7.4144  | 6.2539  | 3.8549  | H(120) | -0.9723  | -3.3548 | -2.7404 |
| N(80)  | 8.5825  | 6.2221  | 3.7175  | H(121) | -3.5960  | -5.9737 | -2.1839 |
| C(81)  | -7.5632 | 6.4172  | -0.6965 | H(122) | -2.2556  | -5.7869 | -3.3255 |
| S(82)  | -7.5706 | 8.0245  | 0.1349  | H(123) | -3.7171  | -0.1102 | -2.1489 |
| C(83)  | -8.2846 | 8.8113  | -1.3733 | H(124) | -6.4722  | 1.0891  | -1.4786 |
| C(84)  | -8.4597 | 7.8427  | -2.3567 | H(125) | -6.6614  | -2.4110 | -1.7469 |
| C(85)  | -8.0668 | 6.5416  | -1.9859 | H(126) | -6.3728  | -0.9117 | -2.6190 |
| C(86)  | -8.5257 | 10.2097 | -1.2814 | H(127) | -2.5691  | -5.6895 | 2.7489  |
| C(87)  | -9.0359 | 11.1618 | -2.1488 | H(128) | -0.8965  | -5.4244 | 3.2724  |
| C(88)  | -9.4970 | 10.9267 | -3.5191 | H(129) | 0.0517   | -5.5718 | -2.5640 |
| O(89)  | -9.9474 | 12.0826 | -4.1177 | H(130) | -5.6534  | -2.1306 | 3.3968  |
| O(90)  | -9.5102 | 9.8448  | -4.1332 | H(131) | -5.0755  | -0.5665 | 3.9868  |
| C(91)  | -9.1194 | 12.5024 | -1.6564 | H(132) | -5.6293  | 1.3510  | 2.7418  |
| N(92)  | -9.1728 | 13.5905 | -1.2158 | H(133) | -3.2316  | -4.8696 | 5.1046  |
| C(93)  | 2.6425  | 0.6729  | -2.6869 | H(134) | -4.3595  | -3.5414 | 5.4662  |
| S(94)  | 3.3662  | 2.2261  | -3.2826 | H(135) | -5.1763  | -6.3308 | 4.4763  |
| C(95)  | 5.0456  | 1.6121  | -2.8755 | H(136) | -5.1897  | -5.8374 | 6.1690  |
| C(96)  | 4.9567  | 0.3401  | -2.3374 | H(137) | -6.8637  | -4.5371 | 3.9506  |
| C(97)  | 3.6421  | -0.1737 | -2.2353 | H(138) | -6.8780  | -4.0509 | 5.6432  |
| C(98)  | 6.1578  | 2.4352  | -3.2641 | H(139) | -7.7469  | -6.3373 | 6.3006  |
| C(99)  | 7.5024  | 2.2612  | -3.0606 | H(140) | -7.7396  | -6.8254 | 4.5982  |
| C(100) | 8.1217  | 1.1545  | -2.2606 | H(141) | -8.8345  | -5.5461 | 5.1480  |
| O(101) | 8.9963  | 0.4096  | -2.7049 | H(142) | -3.1449  | -7.7166 | 1.2278  |
| O(102) | 7.6416  | 0.9614  | -0.9887 | H(143) | -3.6574  | -7.7166 | -0.4743 |
| C(103) | 8.4134  | 3.1147  | -3.7496 | H(144) | -5.3696  | -6.8005 | 1.9012  |
| N(104) | 9.1482  | 3.8173  | -4.3386 | H(145) | -5.8826  | -6.7767 | 0.2145  |
| C(105) | 5.8784  | -4.1567 | -1.0097 | H(146) | -5.1158  | -9.3147 | 1.7820  |
| S(106) | 7.2710  | -4.8476 | -1.9351 | H(147) | -5.6243  | -9.2856 | 0.0976  |
| C(107) | 8.3595  | -3.4875 | -1.3364 | H(148) | -7.8790  | -8.3677 | 0.7868  |
| C(108) | 7.6341  | -2.6499 | -0.5008 | H(149) | -7.3702  | -8.4030 | 2.4838  |
| C(109) | 6.2801  | -3.0204 | -0.3215 | H(150) | -7.5433  | -9.9162 | 1.5796  |
| C(110) | 9.6950  | -3.5188 | -1.8378 | H(151) | -6.0301  | -4.5529 | 1.3302  |
| C(111) | 10.8056 | -2.7113 | -1.7001 | H(152) | -6.4370  | -4.1107 | -0.3395 |
| C(112) | 11.9700 | -3.0993 | -2.4389 | H(153) | -7.7581  | -2.9577 | 2.1981  |
| N(113) | 12.9045 | -3.4665 | -3.0485 | H(154) | -8.1539  | -2.4584 | 0.5559  |
| C(114) | 10.9329 | -1.4915 | -0.8924 | H(155) | -8.5005  | -5.3059 | 1.6586  |
| O(115) | 12.0562 | -0.8116 | -1.1435 | H(156) | -8.8790  | -4.8096 | 0.0133  |
| O(116) | 10.0934 | -1.1314 | -0.0177 | H(157) | -10.6199 | -3.1963 | 0.8947  |
| H(117) | 0.9302  | -5.2327 | 1.6288  | H(158) | -10.2392 | -3.6963 | 2.5503  |

| atom   | x        | y       | z       | atom   | x       | y      | z       |
|--------|----------|---------|---------|--------|---------|--------|---------|
| H(159) | -10.9575 | -4.8552 | 1.4187  | C(196) | 11.0433 | 3.3738 | 1.2590  |
| H(160) | -6.3974  | -3.6490 | -4.0571 | C(197) | 11.1357 | 1.9420 | 0.7823  |
| H(161) | -5.2438  | -4.9724 | -4.3518 | O(198) | 10.0820 | 1.1785 | 1.1288  |
| H(162) | -7.8564  | -5.2362 | -2.7582 | O(199) | 8.9767  | 3.8881 | -0.7726 |
| H(163) | -7.6849  | -5.6792 | -4.4557 | O(200) | 7.4804  | 3.0695 | 0.7475  |
| H(164) | -6.1027  | -6.9427 | -2.1505 | O(201) | 12.1111 | 1.5145 | 0.1308  |
| H(165) | -5.9567  | -7.3952 | -3.8467 | H(202) | 9.3205  | 2.2611 | 2.9491  |
| H(166) | -8.3817  | -8.1325 | -3.8633 | H(203) | 8.9710  | 3.7985 | 3.5937  |
| H(167) | -8.5233  | -7.6873 | -2.1552 | H(204) | 9.6478  | 4.9200 | 1.8002  |
| H(168) | -7.4511  | -9.0119 | -2.6399 | H(205) | 11.4593 | 4.0002 | 0.4652  |
| H(169) | 1.1294   | -1.3669 | 0.8732  | H(206) | 11.6893 | 3.4979 | 2.1379  |
| H(170) | 2.8241   | 0.5916  | 1.0058  | H(207) | 10.0700 | 0.2391 | 0.6975  |
| H(171) | 4.7954   | -6.2121 | -2.6894 | H(208) | 7.5944  | 2.9002 | 1.7525  |
| H(172) | 2.2928   | -6.8625 | -2.4211 |        |         |        |         |
| H(173) | -6.4585  | 5.9500  | 1.9207  |        |         |        |         |
| H(174) | -5.7523  | 3.5483  | 2.5544  |        |         |        |         |
| H(175) | 0.3359   | 2.3234  | -3.2988 |        |         |        |         |
| H(176) | -2.0102  | 1.2111  | -3.2569 |        |         |        |         |
| H(177) | 0.8771   | 3.9455  | 3.9604  |        |         |        |         |
| H(178) | 2.7529   | 5.6985  | 4.4072  |        |         |        |         |
| H(179) | 6.1564   | 4.5043  | 2.7278  |        |         |        |         |
| H(180) | 5.6616   | 8.6796  | 5.9061  |        |         |        |         |
| H(181) | -8.8687  | 8.1030  | -3.3217 |        |         |        |         |
| H(182) | -8.1477  | 5.6932  | -2.6544 |        |         |        |         |
| H(183) | -8.2500  | 10.6303 | -0.3162 |        |         |        |         |
| H(184) | -10.2464 | 11.8898 | -5.0318 |        |         |        |         |
| H(185) | 5.8235   | -0.2267 | -2.0279 |        |         |        |         |
| H(186) | 3.4304   | -1.1647 | -1.8511 |        |         |        |         |
| H(187) | 5.8949   | 3.2946  | -3.8763 |        |         |        |         |
| H(188) | 7.2713   | 1.7624  | -0.5309 |        |         |        |         |
| H(189) | 8.0884   | -1.7774 | -0.0558 |        |         |        |         |
| H(190) | 5.5969   | -2.4530 | 0.2992  |        |         |        |         |
| H(191) | 9.8766   | -4.3611 | -2.5027 |        |         |        |         |
| H(192) | 12.1399  | 0.0657  | -0.6433 |        |         |        |         |
| C(193) | 8.6891   | 3.6274  | 0.3924  |        |         |        |         |
| N(194) | 8.9783   | 3.2017  | 2.7723  |        |         |        |         |
| C(195) | 9.6135   | 3.8427  | 1.6003  |        |         |        |         |

10.

**Table S3** Cartesian coordinates of the 2-Glu complex from B3LYP/6-31G optimization.

| atom  | x       | y       | z       | atom  | x        | y       | z       |
|-------|---------|---------|---------|-------|----------|---------|---------|
| O(1)  | -5.3488 | -2.9968 | 0.9585  | C(39) | -6.3400  | -5.3729 | 5.0191  |
| O(2)  | -3.3663 | -5.8824 | 0.0563  | C(40) | -7.3806  | -6.4618 | 5.3243  |
| C(3)  | -3.0320 | -3.4512 | 2.9317  | C(41) | -3.7122  | -7.3244 | 0.0949  |
| O(4)  | -5.4939 | -4.5491 | -2.3091 | C(42) | -5.1088  | -7.4810 | 0.6723  |
| C(5)  | -6.5574 | 2.5259  | 0.9756  | C(43) | -5.5489  | -8.9564 | 0.7401  |
| C(6)  | 0.7012  | -5.5675 | -0.9542 | C(44) | -6.9531  | -9.1273 | 1.3411  |
| C(7)  | 0.2899  | -5.5438 | 0.3927  | C(45) | -6.3837  | -4.0598 | 0.8879  |
| C(8)  | -1.0637 | -5.5681 | 0.7480  | C(46) | -7.7501  | -3.6538 | 1.4385  |
| C(9)  | -1.7724 | -3.8958 | 2.4812  | C(47) | -8.7536  | -4.8234 | 1.3755  |
| C(10) | -0.7750 | -2.9434 | 2.2514  | C(48) | -10.1433 | -4.4438 | 1.9108  |
| C(11) | -1.0095 | -1.5651 | 2.4167  | C(49) | -6.2928  | -4.7077 | -3.5486 |
| C(12) | -2.3147 | -1.1533 | 2.7483  | C(50) | -7.2811  | -5.8469 | -3.3441 |
| C(13) | -3.3352 | -2.0753 | 2.9984  | C(51) | -6.6285  | -7.2343 | -3.2139 |
| C(14) | -2.6462 | -1.4677 | -2.7489 | C(52) | -7.6607  | -8.3580 | -3.0306 |
| C(15) | -2.2701 | -2.8177 | -2.8680 | C(53) | 1.2817   | -0.7594 | 1.5800  |
| C(16) | -3.1876 | -3.8575 | -2.6728 | C(54) | 2.1732   | 0.3415  | 1.6921  |
| C(17) | -2.7142 | -5.3140 | -2.7071 | C(55) | 1.7050   | 1.3919  | 2.4554  |
| C(18) | 0.0881  | -0.6142 | 2.2554  | S(56) | 0.0377   | 1.0022  | 3.0899  |
| C(19) | 2.1153  | -5.6170 | -1.3155 | S(57) | 3.3761   | -4.9009 | -0.2151 |
| C(20) | -1.7262 | -0.3643 | -3.0090 | C(58) | 4.6893   | -5.4170 | -1.3723 |
| C(21) | -3.9603 | -1.1816 | -2.3304 | C(59) | 4.1332   | -6.0574 | -2.4601 |
| C(22) | -2.0189 | -5.6658 | -0.2815 | C(60) | 2.7147   | -6.1646 | -2.4280 |
| C(23) | -6.4474 | 0.3297  | -0.2252 | S(61) | -6.8166  | 3.4759  | -0.5577 |
| O(24) | -3.9996 | -4.3979 | 3.3311  | C(62) | -7.1566  | 4.9794  | 0.4196  |
| C(25) | -4.5243 | -3.5247 | -2.3766 | C(63) | -7.0513  | 4.6964  | 1.7667  |
| C(26) | -4.9043 | -2.1890 | -2.1295 | C(64) | -6.7241  | 3.3490  | 2.0703  |
| C(27) | -6.2791 | -1.8196 | -1.5698 | S(65) | 0.0783   | -0.5725 | -2.8988 |
| C(28) | -6.1572 | -1.0384 | -0.2661 | C(66) | 0.3117   | 1.1911  | -3.3101 |
| C(29) | -1.4975 | -5.3773 | 2.1956  | C(67) | -0.9138  | 1.7968  | -3.4985 |
| C(30) | -0.2906 | -5.5202 | -1.9568 | C(68) | -2.0324  | 0.9396  | -3.3359 |
| C(31) | -1.6528 | -5.5505 | -1.6384 | C(69) | 2.3295   | 2.6319  | 2.7973  |
| C(32) | -6.2274 | 1.1058  | 0.9311  | C(70) | 1.7626   | 3.7504  | 3.3964  |
| C(33) | -4.7529 | -1.5804 | 3.2736  | C(71) | 2.6467   | 4.8204  | 3.6310  |
| C(34) | -5.6690 | -1.6512 | 0.9067  | C(72) | 3.9621   | 4.5956  | 3.2335  |
| C(35) | -5.6627 | 0.4713  | 2.0604  | S(73) | 4.0940   | 2.9060  | 2.5027  |
| C(36) | -5.3820 | -0.8959 | 2.0649  | C(74) | 5.1651   | 5.3516  | 3.2919  |
| C(37) | -3.8374 | -4.8604 | 4.7302  | C(75) | 5.4689   | 6.6237  | 3.7558  |
| C(38) | -4.8990 | -5.9119 | 5.0192  | C(76) | 4.5399   | 7.5984  | 4.3318  |

| atom   | x       | y       | z       | atom   | x        | y        | z       |
|--------|---------|---------|---------|--------|----------|----------|---------|
| O(77)  | 3.3172  | 7.4644  | 4.5167  | H(118) | 0.2110   | -3.2795  | 1.9519  |
| O(78)  | 5.1787  | 8.7698  | 4.6801  | H(119) | -2.5456  | -0.0931  | 2.7921  |
| C(79)  | 6.8374  | 7.0277  | 3.6621  | H(120) | -1.2438  | -3.0651  | -3.1201 |
| N(80)  | 7.9755  | 7.3050  | 3.5668  | H(121) | -3.5775  | -5.9612  | -2.5495 |
| C(81)  | -7.4792 | 6.2084  | -0.2329 | H(122) | -2.2900  | -5.5488  | -3.6910 |
| S(82)  | -7.8162 | 7.7043  | 0.7268  | H(123) | -4.2375  | -0.1561  | -2.1136 |
| C(83)  | -8.1046 | 8.6496  | -0.8304 | H(124) | -6.8635  | 0.7991   | -1.1121 |
| C(84)  | -7.9305 | 7.8025  | -1.9203 | H(125) | -6.8629  | -2.7316  | -1.4293 |
| C(85)  | -7.5903 | 6.4750  | -1.5923 | H(126) | -6.8238  | -1.2011  | -2.2945 |
| C(86)  | -8.4425 | 10.0208 | -0.6623 | H(127) | -2.4090  | -5.9402  | 2.3975  |
| C(87)  | -8.7348 | 11.0583 | -1.5322 | H(128) | -0.7091  | -5.7500  | 2.8616  |
| C(88)  | -8.7660 | 10.9796 | -2.9947 | H(129) | 0.0092   | -5.4376  | -2.9970 |
| O(89)  | -9.0900 | 12.1885 | -3.5698 | H(130) | -5.3646  | -2.4351  | 3.5714  |
| O(90)  | -8.5393 | 9.9795  | -3.6990 | H(131) | -4.7412  | -0.8698  | 4.1091  |
| C(91)  | -9.0356 | 12.3270 | -0.9433 | H(132) | -5.4340  | 1.0563   | 2.9452  |
| N(92)  | -9.2785 | 13.3520 | -0.4225 | H(133) | -2.8279  | -5.2734  | 4.8506  |
| C(93)  | 1.6190  | 1.7662  | -3.3601 | H(134) | -3.9370  | -3.9957  | 5.4006  |
| S(94)  | 1.8224  | 3.5520  | -3.5673 | H(135) | -4.8029  | -6.7207  | 4.2816  |
| C(95)  | 3.6515  | 3.3679  | -3.4377 | H(136) | -4.6735  | -6.3537  | 6.0013  |
| C(96)  | 3.9678  | 2.0228  | -3.2785 | H(137) | -6.5496  | -4.9194  | 4.0430  |
| C(97)  | 2.8584  | 1.1527  | -3.2359 | H(138) | -6.4225  | -4.5668  | 5.7633  |
| C(98)  | 4.3926  | 4.5825  | -3.4901 | H(139) | -7.2047  | -6.9149  | 6.3080  |
| C(99)  | 5.7185  | 4.9067  | -3.2634 | H(140) | -7.3417  | -7.2654  | 4.5775  |
| C(100) | 6.7841  | 3.9660  | -2.8960 | H(141) | -8.3975  | -6.0534  | 5.3222  |
| O(101) | 6.7217  | 2.7267  | -2.9390 | H(142) | -2.9684  | -7.8471  | 0.7117  |
| O(102) | 7.9239  | 4.6049  | -2.4624 | H(143) | -3.6523  | -7.7294  | -0.9246 |
| C(103) | 6.0757  | 6.2888  | -3.3470 | H(144) | -5.1245  | -7.0374  | 1.6760  |
| N(104) | 6.3468  | 7.4301  | -3.4209 | H(145) | -5.8120  | -6.9077  | 0.0571  |
| C(105) | 6.0567  | -5.1191 | -1.0752 | H(146) | -4.8240  | -9.5297  | 1.3364  |
| S(106) | 7.4054  | -5.8363 | -2.0444 | H(147) | -5.5294  | -9.3917  | -0.2698 |
| C(107) | 8.6351  | -4.8874 | -1.0488 | H(148) | -7.7032  | -8.5871  | 0.7501  |
| C(108) | 7.9671  | -4.1511 | -0.0788 | H(149) | -6.9932  | -8.7383  | 2.3665  |
| C(109) | 6.5637  | -4.2838 | -0.0902 | H(150) | -7.2472  | -10.1823 | 1.3724  |
| C(110) | 10.0030 | -5.0808 | -1.4005 | H(151) | -5.9358  | -4.8509  | 1.4870  |
| C(111) | 11.1817 | -4.4318 | -1.0777 | H(152) | -6.4479  | -4.3981  | -0.1492 |
| C(112) | 12.3846 | -4.9529 | -1.6524 | H(153) | -7.6467  | -3.3167  | 2.4791  |
| N(113) | 13.3493 | -5.4195 | -2.1338 | H(154) | -8.1542  | -2.8037  | 0.8725  |
| C(114) | 11.3161 | -3.2091 | -0.2773 | H(155) | -8.3596  | -5.6745  | 1.9494  |
| O(115) | 12.5277 | -2.6471 | -0.3418 | H(156) | -8.8436  | -5.1689  | 0.3347  |
| O(116) | 10.3702 | -2.7085 | 0.3976  | H(157) | -10.5768 | -3.6179  | 1.3335  |
| H(117) | 1.0393  | -5.5408 | 1.1786  | H(158) | -10.0876 | -4.1236  | 2.9586  |

| atom   | x        | y       | z       | atom   | x       | y       | z       |
|--------|----------|---------|---------|--------|---------|---------|---------|
| H(159) | -10.8362 | -5.2911 | 1.8560  | C(196) | 10.2287 | 2.5006  | 1.7957  |
| H(160) | -6.8116  | -3.7632 | -3.7560 | C(197) | 11.4166 | 1.9037  | 1.0242  |
| H(161) | -5.6082  | -4.9154 | -4.3818 | C(198) | 11.4451 | 0.4030  | 0.9474  |
| H(162) | -7.8866  | -5.6339 | -2.4522 | O(199) | 10.2656 | -0.2033 | 1.1490  |
| H(163) | -7.9724  | -5.8469 | -4.1999 | H(200) | 10.2904 | -1.2000 | 0.9500  |
| H(164) | -5.9342  | -7.2224 | -2.3649 | O(201) | 9.6764  | 3.5549  | -0.8190 |
| H(165) | -6.0243  | -7.4325 | -4.1117 | O(202) | 8.7083  | 5.4049  | 0.0986  |
| H(166) | -8.3544  | -8.4008 | -3.8796 | H(203) | 8.9154  | 5.5509  | 2.4580  |
| H(167) | -8.2566  | -8.2027 | -2.1223 | H(204) | 9.4415  | 4.3667  | 3.5214  |
| H(168) | -7.1745  | -9.3367 | -2.9479 | H(205) | 11.0339 | 4.4999  | 1.5461  |
| H(169) | 1.5114   | -1.6376 | 0.9896  | H(206) | 9.3082  | 1.9772  | 1.5285  |
| H(170) | 3.1404   | 0.3687  | 1.2039  | H(207) | 10.3761 | 2.3490  | 2.8727  |
| H(171) | 4.7355   | -6.4438 | -3.2738 | H(208) | 12.3802 | 2.2353  | 1.4264  |
| H(172) | 2.1467   | -6.6664 | -3.2017 | H(209) | 11.3729 | 2.2475  | -0.0182 |
| H(173) | -7.2189  | 5.4470  | 2.5301  | O(210) | 12.4910 | -0.2297 | 0.6513  |
| H(174) | -6.6389  | 2.9872  | 3.0870  | H(211) | 8.3236  | 5.5401  | -0.8078 |
| H(175) | -1.0076  | 2.8449  | -3.7570 |        |         |         |         |
| H(176) | -3.0513  | 1.2765  | -3.4779 |        |         |         |         |
| H(177) | 0.7107   | 3.7926  | 3.6508  |        |         |         |         |
| H(178) | 2.3588   | 5.7590  | 4.0809  |        |         |         |         |
| H(179) | 6.0379   | 4.8272  | 2.9015  |        |         |         |         |
| H(180) | 4.5304   | 9.4038  | 5.0539  |        |         |         |         |
| H(181) | -8.0551  | 8.1676  | -2.9290 |        |         |         |         |
| H(182) | -7.4269  | 5.7105  | -2.3419 |        |         |         |         |
| H(183) | -8.4827  | 10.3279 | 0.3810  |        |         |         |         |
| H(184) | -9.0995  | 12.1011 | -4.5468 |        |         |         |         |
| H(185) | 4.9955   | 1.7018  | -3.1969 |        |         |         |         |
| H(186) | 2.9590   | 0.0808  | -3.1165 |        |         |         |         |
| H(187) | 3.7787   | 5.4521  | -3.7167 |        |         |         |         |
| H(188) | 8.6401   | 3.9666  | -2.1605 |        |         |         |         |
| H(189) | 8.5093   | -3.5268 | 0.6131  |        |         |         |         |
| H(190) | 5.9206   | -3.7563 | 0.6035  |        |         |         |         |
| H(191) | 10.1551  | -5.9042 | -2.0961 |        |         |         |         |
| H(192) | 12.5837  | -1.7351 | 0.1190  |        |         |         |         |
| C(193) | 9.4567   | 4.2804  | 0.1777  |        |         |         |         |
| N(194) | 9.1392   | 4.5676  | 2.5744  |        |         |         |         |
| C(195) | 10.0321  | 4.0161  | 1.5585  |        |         |         |         |

11.

**Table S4** Cartesian coordinates of the 2-Lys complex from B3LYP/6-31G optimization.

| atom  | x       | y       | z       | atom  | x       | y       | z       |
|-------|---------|---------|---------|-------|---------|---------|---------|
| O(1)  | -4.8452 | -3.4960 | 0.9741  | C(39) | -5.4222 | -5.9088 | 5.1104  |
| O(2)  | -2.5368 | -6.1217 | 0.0440  | C(40) | -6.3376 | -7.0860 | 5.4821  |
| C(3)  | -2.4314 | -3.6589 | 2.8952  | C(41) | -2.6817 | -7.5962 | 0.1103  |
| O(4)  | -4.9103 | -5.0669 | -2.2647 | C(42) | -4.0295 | -7.9302 | 0.7273  |
| C(5)  | -6.7178 | 1.8377  | 1.0402  | C(43) | -4.2605 | -9.4499 | 0.8361  |
| C(6)  | 1.4091  | -5.2290 | -1.1088 | C(44) | -5.6144 | -9.7982 | 1.4746  |
| C(7)  | 1.0482  | -5.2804 | 0.2520  | C(45) | -5.7307 | -4.6875 | 0.9433  |
| C(8)  | -0.2741 | -5.4993 | 0.6556  | C(46) | -7.1180 | -4.4655 | 1.5453  |
| C(9)  | -1.1344 | -3.9410 | 2.4211  | C(47) | -7.9566 | -5.7597 | 1.5184  |
| C(10) | -0.2710 | -2.8705 | 2.1720  | C(48) | -9.3574 | -5.5728 | 2.1224  |
| C(11) | -0.6757 | -1.5316 | 2.3324  | C(49) | -5.7136 | -5.3446 | -3.4797 |
| C(12) | -2.0172 | -1.2890 | 2.6847  | C(50) | -6.5321 | -6.6049 | -3.2390 |
| C(13) | -2.9056 | -2.3324 | 2.9630  | C(51) | -5.6930 | -7.8890 | -3.1184 |
| C(14) | -2.4919 | -1.6549 | -2.8176 | C(52) | -6.5538 | -9.1400 | -2.8833 |
| C(15) | -1.9527 | -2.9476 | -2.9388 | C(53) | 1.5191  | -0.4795 | 1.5177  |
| C(16) | -2.7233 | -4.0926 | -2.7058 | C(54) | 2.2584  | 0.7317  | 1.5888  |
| C(17) | -2.0670 | -5.4760 | -2.7396 | C(55) | 1.6311  | 1.7548  | 2.2690  |
| C(18) | 0.2917  | -0.4527 | 2.1457  | S(56) | 0.0040  | 1.1912  | 2.8753  |
| C(19) | 2.7977  | -5.0653 | -1.5274 | S(57) | 4.0370  | -4.3433 | -0.4041 |
| C(20) | -1.7161 | -0.4520 | -3.1030 | C(58) | 5.3288  | -4.5648 | -1.6741 |
| C(21) | -3.8192 | -1.5313 | -2.3629 | C(59) | 4.7797  | -5.1262 | -2.8092 |
| C(22) | -1.2443 | -5.7249 | -0.3397 | C(60) | 3.3885  | -5.4008 | -2.7269 |
| C(23) | -6.3919 | -0.3355 | -0.1625 | S(61) | -7.1033 | 2.7532  | -0.4873 |
| O(24) | -3.2631 | -4.7184 | 3.3190  | C(62) | -7.5898 | 4.2109  | 0.4975  |
| C(25) | -4.0815 | -3.9282 | -2.3707 | C(63) | -7.4340 | 3.9410  | 1.8424  |
| C(26) | -4.6207 | -2.6483 | -2.1235 | C(64) | -6.9571 | 2.6373  | 2.1388  |
| C(27) | -6.0106 | -2.4516 | -1.5153 | S(65) | 0.1014  | -0.4535 | -3.0223 |
| C(28) | -5.9398 | -1.6586 | -0.2148 | C(66) | 0.1259  | 1.3229  | -3.4394 |
| C(29) | -0.6777 | -5.3737 | 2.1195  | C(67) | -1.1629 | 1.7853  | -3.6104 |
| C(30) | 0.3821  | -5.3217 | -2.0731 | C(68) | -2.1746 | 0.8066  | -3.4280 |
| C(31) | -0.9475 | -5.5546 | -1.7074 | C(69) | 2.0869  | 3.0821  | 2.5492  |
| C(32) | -6.2278 | 0.4649  | 0.9864  | C(70) | 1.3551  | 4.1832  | 2.9735  |
| C(33) | -4.3665 | -2.0185 | 3.2767  | C(71) | 2.1046  | 5.3592  | 3.1795  |
| C(34) | -5.3396 | -2.2039 | 0.9391  | C(72) | 3.4694  | 5.2374  | 2.9374  |
| C(35) | -5.5565 | -0.0946 | 2.0968  | S(73) | 3.8384  | 3.5096  | 2.4035  |
| C(36) | -5.1111 | -1.4173 | 2.0895  | C(74) | 4.5922  | 6.1047  | 3.0438  |
| C(37) | -2.9943 | -5.1645 | 4.7066  | C(75) | 4.7329  | 7.4355  | 3.4074  |
| C(38) | -3.9386 | -6.3101 | 5.0414  | C(76) | 3.6669  | 8.3715  | 3.7656  |

| atom   | x        | y       | z       | atom   | x       | y        | z       |
|--------|----------|---------|---------|--------|---------|----------|---------|
| O(77)  | 2.4448   | 8.1447  | 3.8201  | H(118) | 0.7434  | -3.0820  | 1.8549  |
| O(78)  | 4.1618   | 9.6254  | 4.0606  | H(119) | -2.3831 | -0.2675  | 2.7284  |
| C(79)  | 6.0709   | 7.9420  | 3.4438  | H(120) | -0.9115 | -3.0651  | -3.2210 |
| N(80)  | 7.1968   | 8.2797  | 3.4723  | H(121) | -2.8329 | -6.2267  | -2.5431 |
| C(81)  | -8.0513  | 5.3982  | -0.1486 | H(122) | -1.6498 | -5.6704  | -3.7354 |
| S(82)  | -8.5163  | 6.8560  | 0.8162  | H(123) | -4.2165 | -0.5463  | -2.1444 |
| C(83)  | -8.9313  | 7.7623  | -0.7357 | H(124) | -6.8908 | 0.0779   | -1.0343 |
| C(84)  | -8.6968  | 6.9329  | -1.8280 | H(125) | -6.4710 | -3.4289  | -1.3565 |
| C(85)  | -8.2181  | 5.6475  | -1.5056 | H(126) | -6.6533 | -1.9066  | -2.2183 |
| C(86)  | -9.4004  | 9.0936  | -0.5621 | H(127) | -1.4983 | -6.0537  | 2.3486  |
| C(87)  | -9.8106  | 10.0949 | -1.4268 | H(128) | 0.1765  | -5.6400  | 2.7548  |
| C(88)  | -9.8626  | 10.0096 | -2.8882 | H(129) | 0.6235  | -5.1915  | -3.1233 |
| O(89)  | -10.3119 | 11.1803 | -3.4581 | H(130) | -4.8591 | -2.9424  | 3.5880  |
| O(90)  | -9.5551  | 9.0338  | -3.5960 | H(131) | -4.4203 | -1.3124  | 4.1144  |
| C(91)  | -10.2232 | 11.3295 | -0.8330 | H(132) | -5.3721 | 0.5166   | 2.9743  |
| N(92)  | -10.5557 | 12.3269 | -0.3084 | H(133) | -1.9464 | -5.4823  | 4.7790  |
| C(93)  | 1.3617   | 2.0385  | -3.4982 | H(134) | -3.1419 | -4.3129  | 5.3849  |
| S(94)  | 1.3710   | 3.8362  | -3.7035 | H(135) | -3.8024 | -7.1083  | 4.2986  |
| C(95)  | 3.2073   | 3.8508  | -3.5542 | H(136) | -3.6270 | -6.7266  | 6.0110  |
| C(96)  | 3.6679   | 2.5481  | -3.4015 | H(137) | -5.7237 | -5.4925  | 4.1419  |
| C(97)  | 2.6593   | 1.5622  | -3.3710 | H(138) | -5.5424 | -5.1024  | 5.8492  |
| C(98)  | 3.8138   | 5.1393  | -3.5813 | H(139) | -6.0714 | -7.5013  | 6.4622  |
| C(99)  | 5.0787   | 5.6030  | -3.2695 | H(140) | -6.2582 | -7.8964  | 4.7459  |
| C(100) | 6.2062   | 4.7791  | -2.8127 | H(141) | -7.3880 | -6.7763  | 5.5249  |
| O(101) | 6.3102   | 3.5466  | -2.9181 | H(142) | -1.8585 | -8.0032  | 0.7132  |
| O(102) | 7.1861   | 5.5291  | -2.2013 | H(143) | -2.5929 | -8.0061  | -0.9054 |
| C(103) | 5.2925   | 7.0151  | -3.3402 | H(144) | -4.0822 | -7.4700  | 1.7222  |
| N(104) | 5.4410   | 8.1788  | -3.4128 | H(145) | -4.8193 | -7.4719  | 0.1203  |
| C(105) | 6.6823   | -4.1920 | -1.4047 | H(146) | -3.4509 | -9.9032  | 1.4268  |
| S(106) | 7.9926   | -4.5730 | -2.5914 | H(147) | -4.2024 | -9.9031  | -0.1644 |
| C(107) | 9.2444   | -3.8143 | -1.4652 | H(148) | -6.4447 | -9.3852  | 0.8884  |
| C(108) | 8.6052   | -3.3414 | -0.3229 | H(149) | -5.6880 | -9.3897  | 2.4906  |
| C(109) | 7.2116   | -3.5483 | -0.2935 | H(150) | -5.7570 | -10.8826 | 1.5395  |
| C(110) | 10.5816  | -3.8436 | -1.9454 | H(151) | -5.1600 | -5.4090  | 1.5257  |
| C(111) | 11.8112  | -3.4620 | -1.4310 | H(152) | -5.7875 | -5.0368  | -0.0906 |
| C(112) | 12.9523  | -3.6730 | -2.2682 | H(153) | -7.0215 | -4.1142  | 2.5818  |
| N(113) | 13.8647  | -3.8634 | -2.9836 | H(154) | -7.6546 | -3.6793  | 0.9971  |
| C(114) | 12.0559  | -2.8812 | -0.1131 | H(155) | -7.4238 | -6.5516  | 2.0643  |
| O(115) | 13.3907  | -2.6299 | 0.1058  | H(156) | -8.0493 | -6.1106  | 0.4797  |
| O(116) | 11.2065  | -2.6221 | 0.7613  | H(157) | -9.9232 | -4.8076  | 1.5768  |
| H(117) | 1.8165   | -5.1748 | 1.0122  | H(158) | -9.2948 | -5.2554  | 3.1706  |



| atom   | x        | y        | z       | atom   | x       | y       | z       |
|--------|----------|----------|---------|--------|---------|---------|---------|
| H(159) | -9.9334  | -6.5045  | 2.0881  | C(196) | 8.3976  | 2.8723  | 2.1159  |
| H(160) | -6.3612  | -4.4812  | -3.6781 | C(197) | 9.4463  | 2.0078  | 1.3936  |
| H(161) | -5.0302  | -5.4652  | -4.3310 | C(198) | 9.1500  | 0.4967  | 1.4276  |
| H(162) | -7.1344  | -6.4658  | -2.3306 | C(199) | 9.1091  | -0.1183 | 2.8366  |
| H(163) | -7.2417  | -6.7078  | -4.0734 | N(200) | 9.0771  | -1.5848 | 2.7560  |
| H(164) | -4.9768  | -7.7692  | -2.2963 | O(201) | 8.8248  | 4.4887  | -0.4203 |
| H(165) | -5.0997  | -8.0181  | -4.0358 | O(202) | 7.2594  | 5.8110  | 0.5855  |
| H(166) | -7.2634  | -9.2943  | -3.7059 | H(203) | 7.9604  | 6.1235  | 3.0060  |
| H(167) | -7.1346  | -9.0515  | -1.9564 | H(204) | 8.0833  | 4.7509  | 3.9721  |
| H(168) | -5.9345  | -10.0408 | -2.8046 | H(205) | 9.7412  | 4.5643  | 2.0582  |
| H(169) | 1.8864   | -1.3526  | 0.9932  | H(206) | 7.3868  | 2.6484  | 1.7501  |
| H(170) | 3.2316   | 0.8562   | 1.1286  | H(207) | 8.3972  | 2.6381  | 3.1893  |
| H(171) | 5.3721   | -5.3476  | -3.6891 | H(208) | 10.4320 | 2.1943  | 1.8486  |
| H(172) | 2.8379   | -5.8697  | -3.5327 | H(209) | 9.5213  | 2.3332  | 0.3509  |
| H(173) | -7.6708  | 4.6689   | 2.6095  | H(210) | 8.1986  | 0.2828  | 0.9220  |
| H(174) | -6.8168  | 2.2865   | 3.1533  | H(211) | 9.9278  | -0.0229 | 0.8508  |
| H(175) | -1.3791  | 2.8158   | -3.8662 | H(212) | 8.2058  | 0.2111  | 3.3649  |
| H(176) | -3.2277  | 1.0247   | -3.5517 | H(213) | 9.9706  | 0.2692  | 3.4178  |
| H(177) | 0.2823   | 4.1382   | 3.1157  | H(214) | 9.9176  | -1.9869 | 2.3507  |
| H(178) | 1.6820   | 6.3014   | 3.4964  | H(215) | 8.8104  | -2.0481 | 3.6179  |
| H(179) | 5.5475   | 5.6257   | 2.8137  | H(216) | 7.0491  | 6.0878  | -0.3456 |
| H(180) | 3.4224   | 10.2292  | 4.2854  |        |         |         |         |
| H(181) | -8.8792  | 7.2797   | -2.8344 |        |         |         |         |
| H(182) | -7.9951  | 4.9005   | -2.2575 |        |         |         |         |
| H(183) | -9.4501  | 9.3981   | 0.4815  |        |         |         |         |
| H(184) | -10.3322 | 11.0893  | -4.4345 |        |         |         |         |
| H(185) | 4.7239   | 2.3398   | -3.3142 |        |         |         |         |
| H(186) | 2.8742   | 0.5072   | -3.2527 |        |         |         |         |
| H(187) | 3.1242   | 5.9369   | -3.8509 |        |         |         |         |
| H(188) | 7.9512   | 4.9726   | -1.8564 |        |         |         |         |
| H(189) | 9.1308   | -2.8443  | 0.4771  |        |         |         |         |
| H(190) | 6.6016   | -3.2190  | 0.5385  |        |         |         |         |
| H(191) | 10.6671  | -4.2689  | -2.9436 |        |         |         |         |
| H(192) | 13.5196  | -2.2388  | 0.9959  |        |         |         |         |
| C(193) | 8.2609   | 4.8972   | 0.6204  |        |         |         |         |
| N(194) | 7.9035   | 5.1097   | 3.0408  |        |         |         |         |
| C(195) | 8.6466   | 4.4067   | 2.0012  |        |         |         |         |

12.

**Table S5** Cartesian coordinates of the 2-Arg complex from B3LYP/6-31G optimization.

| atom  | x       | y       | z       | atom  | x        | y       | z       |
|-------|---------|---------|---------|-------|----------|---------|---------|
| O(1)  | -5.7350 | -2.8064 | 1.0097  | C(39) | -6.6273  | -5.0852 | 5.1887  |
| O(2)  | -3.8358 | -5.7939 | 0.1699  | C(40) | -7.6664  | -6.1420 | 5.5947  |
| C(3)  | -3.3693 | -3.2684 | 2.9426  | C(41) | -4.1889  | -7.2304 | 0.2655  |
| O(4)  | -6.0620 | -4.4036 | -2.2055 | C(42) | -5.5653  | -7.3568 | 0.8976  |
| C(5)  | -6.8679 | 2.7335  | 1.0038  | C(43) | -6.0118  | -8.8259 | 1.0295  |
| C(6)  | 0.1817  | -5.4607 | -1.0383 | C(44) | -7.3982  | -8.9672 | 1.6779  |
| C(7)  | -0.1678 | -5.4176 | 0.3255  | C(45) | -6.7879  | -3.8552 | 0.9983  |
| C(8)  | -1.5036 | -5.4580 | 0.7440  | C(46) | -8.1094  | -3.4310 | 1.6372  |
| C(9)  | -2.1313 | -3.7381 | 2.4599  | C(47) | -9.1315  | -4.5860 | 1.6396  |
| C(10) | -1.1361 | -2.8012 | 2.1673  | C(48) | -10.4737 | -4.1912 | 2.2756  |
| C(11) | -1.3522 | -1.4174 | 2.3044  | C(49) | -6.8632  | -4.5868 | -3.4394 |
| C(12) | -2.6373 | -0.9815 | 2.6784  | C(50) | -7.9080  | -5.6628 | -3.1819 |
| C(13) | -3.6564 | -1.8876 | 2.9873  | C(51) | -7.3245  | -7.0679 | -2.9513 |
| C(14) | -3.0899 | -1.4548 | -2.7229 | C(52) | -8.4121  | -8.1293 | -2.7230 |
| C(15) | -2.7800 | -2.8208 | -2.8424 | C(53) | 0.8633   | -0.6564 | 1.2646  |
| C(16) | -3.7365 | -3.8180 | -2.6246 | C(54) | 1.8033   | 0.4062  | 1.3198  |
| C(17) | -3.3146 | -5.2917 | -2.6316 | C(55) | 1.4572   | 1.4445  | 2.1614  |
| C(18) | -0.2492 | -0.4907 | 2.0619  | S(56) | -0.1553  | 1.0985  | 2.9451  |
| C(19) | 1.5774  | -5.4536 | -1.4719 | S(57) | 2.8594   | -4.6343 | -0.4678 |
| C(20) | -2.0950 | -0.4141 | -2.9618 | C(58) | 4.1278   | -5.0916 | -1.6996 |
| C(21) | -4.3861 | -1.1036 | -2.2999 | C(59) | 3.5449   | -5.7932 | -2.7337 |
| C(22) | -2.5045 | -5.5919 | -0.2364 | C(60) | 2.1407   | -5.9898 | -2.6073 |
| C(23) | -6.8190 | 0.5243  | -0.1767 | S(61) | -7.1528  | 3.6715  | -0.5322 |
| O(24) | -4.3320 | -4.1942 | 3.3995  | C(62) | -7.4457  | 5.1897  | 0.4374  |
| C(25) | -5.0520 | -3.4229 | -2.3131 | C(63) | -7.3099  | 4.9190  | 1.7843  |
| C(26) | -5.3708 | -2.0685 | -2.0798 | C(64) | -6.9945  | 3.5702  | 2.0937  |
| C(27) | -6.7209 | -1.6397 | -1.5031 | S(65) | -0.3196  | -0.7705 | -2.7974 |
| C(28) | -6.5503 | -0.8484 | -0.2109 | C(66) | 0.0714   | 0.9681  | -3.1845 |
| C(29) | -1.8751 | -5.2284 | 2.2039  | C(67) | -1.0925  | 1.6756  | -3.4072 |
| C(30) | -0.8575 | -5.4681 | -1.9933 | C(68) | -2.2844  | 0.9121  | -3.2856 |
| C(31) | -2.2029 | -5.5121 | -1.6113 | C(69) | 2.1875   | 2.6290  | 2.4878  |
| C(32) | -6.5596 | 1.3084  | 0.9659  | C(70) | 1.7720   | 3.7561  | 3.1874  |
| C(33) | -5.0599 | -1.3731 | 3.2969  | C(71) | 2.7583   | 4.7447  | 3.3763  |
| C(34) | -6.0406 | -1.4570 | 0.9553  | C(72) | 4.0059   | 4.4389  | 2.8389  |
| C(35) | -5.9761 | 0.6768  | 2.0871  | S(73) | 3.9287   | 2.7861  | 2.0257  |
| C(36) | -5.7135 | -0.6940 | 2.0981  | C(74) | 5.2756   | 5.0767  | 2.8091  |
| C(37) | -4.1295 | -4.6122 | 4.8073  | C(75) | 5.7685   | 6.2747  | 3.3026  |
| C(38) | -5.1922 | -5.6394 | 5.1696  | C(76) | 5.0076   | 7.2950  | 4.0249  |

| atom   | x       | y       | z       | atom   | x        | y        | z       |
|--------|---------|---------|---------|--------|----------|----------|---------|
| O(77)  | 3.7988  | 7.2653  | 4.3164  | H(118) | -0.1639  | -3.1518  | 1.8413  |
| O(78)  | 5.7948  | 8.3689  | 4.3804  | H(119) | -2.8544  | 0.0822   | 2.7037  |
| C(79)  | 7.1601  | 6.5257  | 3.0889  | H(120) | -1.7683  | -3.1145  | -3.1007 |
| N(80)  | 8.3098  | 6.6649  | 2.8946  | H(121) | -4.1874  | -5.9028  | -2.4001 |
| C(81)  | -7.7670 | 6.4165  | -0.2197 | H(122) | -2.9536  | -5.5778  | -3.6272 |
| S(82)  | -8.0550 | 7.9277  | 0.7319  | H(123) | -4.6136  | -0.0646  | -2.0880 |
| C(83)  | -8.3708 | 8.8606  | -0.8276 | H(124) | -7.2493  | 0.9911   | -1.0581 |
| C(84)  | -8.2394 | 7.9990  | -1.9122 | H(125) | -7.3357  | -2.5280  | -1.3432 |
| C(85)  | -7.9108 | 6.6701  | -1.5786 | H(126) | -7.2541  | -1.0096  | -2.2265 |
| C(86)  | -8.6829 | 10.2387 | -0.6660 | H(127) | -2.7788  | -5.7820  | 2.4588  |
| C(87)  | -8.9826 | 11.2711 | -1.5395 | H(128) | -1.0602  | -5.5859  | 2.8460  |
| C(88)  | -9.0549 | 11.1769 | -2.9995 | H(129) | -0.6081  | -5.4048  | -3.0481 |
| O(89)  | -9.3765 | 12.3842 | -3.5795 | H(130) | -5.6724  | -2.2175  | 3.6210  |
| O(90)  | -8.8623 | 10.1658 | -3.6984 | H(131) | -5.0174  | -0.6538  | 4.1240  |
| C(91)  | -9.2475 | 12.5508 | -0.9571 | H(132) | -5.7169  | 1.2671   | 2.9600  |
| N(92)  | -9.4600 | 13.5851 | -0.4415 | H(133) | -3.1212  | -5.0334  | 4.9083  |
| C(93)  | 1.4289  | 1.4130  | -3.1788 | H(134) | -4.1967  | -3.7242  | 5.4508  |
| S(94)  | 1.8377  | 3.1586  | -3.4165 | H(135) | -5.1262  | -6.4803  | 4.4654  |
| C(95)  | 3.6260  | 2.7810  | -3.1717 | H(136) | -4.9417  | -6.0411  | 6.1629  |
| C(96)  | 3.7825  | 1.4155  | -2.9589 | H(137) | -6.8676  | -4.6873  | 4.1957  |
| C(97)  | 2.5847  | 0.6729  | -2.9653 | H(138) | -6.6754  | -4.2359  | 5.8866  |
| C(98)  | 4.5057  | 3.8990  | -3.2221 | H(139) | -7.4616  | -6.5352  | 6.5985  |
| C(99)  | 5.8493  | 4.0726  | -2.9404 | H(140) | -7.6600  | -6.9909  | 4.8987  |
| C(100) | 6.7777  | 3.0347  | -2.4697 | H(141) | -8.6792  | -5.7235  | 5.6005  |
| O(101) | 6.5484  | 1.8154  | -2.4037 | H(142) | -3.4271  | -7.7402  | 0.8710  |
| O(102) | 7.9857  | 3.5488  | -2.0744 | H(143) | -4.1696  | -7.6675  | -0.7423 |
| C(103) | 6.3774  | 5.3949  | -3.0707 | H(144) | -5.5428  | -6.8798  | 1.8857  |
| N(104) | 6.7977  | 6.4873  | -3.1809 | H(145) | -6.2871  | -6.7991  | 0.2890  |
| C(105) | 5.4952  | -4.7127 | -1.5025 | H(146) | -5.2723  | -9.3829  | 1.6234  |
| S(106) | 6.8039  | -5.3920 | -2.5522 | H(147) | -6.0244  | -9.2955  | 0.0350  |
| C(107) | 8.0624  | -4.4002 | -1.6406 | H(148) | -8.1632  | -8.4448  | 1.0903  |
| C(108) | 7.4340  | -3.6620 | -0.6483 | H(149) | -7.4055  | -8.5412  | 2.6892  |
| C(109) | 6.0342  | -3.8377 | -0.5719 | H(150) | -7.6958  | -10.0188 | 1.7564  |
| C(110) | 9.4117  | -4.5650 | -2.0794 | H(151) | -6.3134  | -4.6560  | 1.5632  |
| C(111) | 10.6261 | -4.0358 | -1.6905 | H(152) | -6.9244  | -4.1869  | -0.0339 |
| C(112) | 11.7801 | -4.4973 | -2.4029 | H(153) | -7.9324  | -3.0967  | 2.6686  |
| N(113) | 12.7002 | -4.9013 | -3.0121 | H(154) | -8.5378  | -2.5747  | 1.0989  |
| C(114) | 10.8777 | -3.0348 | -0.6321 | H(155) | -8.7095  | -5.4463  | 2.1789  |
| O(115) | 12.1689 | -2.7366 | -0.4808 | H(156) | -9.3002  | -4.9232  | 0.6060  |
| O(116) | 9.9663  | -2.5029 | 0.0605  | H(157) | -10.9338 | -3.3524  | 1.7389  |
| H(117) | 0.6174  | -5.3766 | 1.0745  | H(158) | -10.3391 | -3.8838  | 3.3200  |

| atom   | x        | y       | z       | atom   | x       | y       | z       |
|--------|----------|---------|---------|--------|---------|---------|---------|
| H(159) | -11.1821 | -5.0273 | 2.2613  | C(196) | 11.7063 | 2.4088  | 1.5809  |
| H(160) | -7.3328  | -3.6293 | -3.6985 | C(197) | 12.6135 | 1.8205  | 0.4679  |
| H(161) | -6.1870  | -4.8714 | -4.2568 | C(198) | 12.2563 | 0.3848  | 0.0482  |
| H(162) | -8.5170  | -5.3658 | -2.3168 | N(199) | 12.7235 | -0.6906 | 0.9957  |
| H(163) | -8.5847  | -5.6849 | -4.0490 | C(200) | 12.1748 | -0.7158 | 2.3344  |
| H(164) | -6.6480  | -7.0342 | -2.0888 | O(201) | 9.8590  | 2.6266  | -0.5370 |
| H(165) | -6.7118  | -7.3499 | -3.8206 | O(202) | 9.6103  | 4.8825  | -0.2633 |
| H(166) | -9.0875  | -8.1964 | -3.5852 | N(203) | 10.8381 | -1.0098 | 2.3641  |
| H(167) | -9.0209  | -7.8879 | -1.8425 | N(204) | 13.0035 | -0.4826 | 3.2989  |
| H(168) | -7.9741  | -9.1213 | -2.5646 | H(205) | 9.8929  | 5.1987  | 2.2511  |
| H(169) | 0.9944   | -1.5218 | 0.6271  | H(206) | 10.7828 | 4.1817  | 3.2674  |
| H(170) | 2.7156   | 0.4169  | 0.7349  | H(207) | 11.9253 | 4.4638  | 0.9178  |
| H(171) | 4.1178   | -6.1617 | -3.5763 | H(208) | 10.8711 | 1.7337  | 1.7901  |
| H(172) | 1.5590   | -6.5434 | -3.3342 | H(209) | 12.2745 | 2.5075  | 2.5133  |
| H(173) | -7.4471  | 5.6797  | 2.5438  | H(210) | 13.6678 | 1.8577  | 0.7737  |
| H(174) | -6.8886  | 3.2173  | 3.1116  | H(211) | 12.5367 | 2.4381  | -0.4361 |
| H(175) | -1.0908  | 2.7300  | -3.6568 | H(212) | 11.1754 | 0.2874  | -0.0764 |
| H(176) | -3.2681  | 1.3329  | -3.4512 | H(213) | 12.7237 | 0.1432  | -0.9125 |
| H(177) | 0.7574   | 3.8625  | 3.5512  | H(214) | 13.7378 | -0.6481 | 1.1096  |
| H(178) | 2.5925   | 5.6785  | 3.8933  | H(215) | 8.9353  | 4.8222  | -0.9893 |
| H(179) | 6.0388   | 4.4917  | 2.2991  | H(216) | 10.3461 | -0.9913 | 3.2421  |
| H(180) | 5.2545   | 9.0369  | 4.8535  | H(217) | 10.3829 | -1.4415 | 1.5578  |
| H(181) | -8.3857  | 8.3552  | -2.9213 | H(218) | 12.6060 | -0.6054 | 4.2362  |
| H(182) | -7.7796  | 5.8950  | -2.3237 |        |         |         |         |
| H(183) | -8.6899  | 10.5577 | 0.3744  |        |         |         |         |
| H(184) | -9.4141  | 12.2860 | -4.5547 |        |         |         |         |
| H(185) | 4.7618   | 0.9894  | -2.7999 |        |         |         |         |
| H(186) | 2.5602   | -0.3995 | -2.8149 |        |         |         |         |
| H(187) | 4.0120   | 4.8239  | -3.5144 |        |         |         |         |
| H(188) | 8.6183   | 2.8677  | -1.6815 |        |         |         |         |
| H(189) | 8.0058   | -3.0045 | -0.0109 |        |         |         |         |
| H(190) | 5.4179   | -3.3152 | 0.1496  |        |         |         |         |
| H(191) | 9.5067   | -5.2723 | -2.9012 |        |         |         |         |
| H(192) | 12.3928  | -1.9422 | 0.2163  |        |         |         |         |
| C(193) | 10.1485  | 3.6846  | 0.0671  |        |         |         |         |
| N(194) | 10.3282  | 4.2888  | 2.3691  |        |         |         |         |
| C(195) | 11.1098  | 3.7843  | 1.2394  |        |         |         |         |

13.

**Table 6** Hydrogen bonds in 2–Asp complex, 2–Glu complex, 2–Lys complex and 2–Arg complex based on computational study (B3LYP/6-31G).

| System        | H-bond interaction | Distance (Å) |       | H-bond angle (°) |
|---------------|--------------------|--------------|-------|------------------|
|               | D–H···A            | D·····A      | H···A | ∠ D–H···A        |
| 2–Asp complex | O198–H207···O116   | 2.579        | 1.546 | 176.7            |
|               | O115–H1927···O201  | 2.653        | 1.643 | 174.0            |
|               | O102–H188···O200   | 2.736        | 1.840 | 148.2            |
|               | N194–H202···O198   | 2.831        | 2.251 | 114.7            |
|               | N194–H203···N80    | 3.189        | 2.458 | 128.4            |
| 2–Glu complex | O199–H200···O116   | 2.618        | 1.608 | 171.1            |
|               | O115–H192···O210   | 2.614        | 1.599 | 170.2            |
|               | O102–H188···O201   | 2.622        | 1.744 | 143.5            |
|               | O202–H211···O102   | 2.795        | 1.942 | 142.3            |
|               | N194–H203···N80    | 3.136        | 2.278 | 141.4            |
| 2–Lys complex | N200–H214···O116   | 3.097        | 2.143 | 155.6            |
|               | O102–H188···O201   | 2.634        | 1.749 | 144.4            |
|               | O202–H216···O102   | 2.802        | 1.943 | 143.1            |
|               | N194–H203···N80    | 3.276        | 2.334 | 153.7            |
| 2–Arg complex | N203–H217···O116   | 2.880        | 1.882 | 164.8            |
|               | O102–H188···O201   | 2.593        | 1.705 | 144.4            |
|               | O202–H215···O102   | 2.775        | 1.924 | 142.0            |
|               | O115–H192···N199   | 2.583        | 1.511 | 170.8            |
|               | N194–H205···N80    | 3.162        | 2.252 | 148.4            |

14.

**Table S7** Energies of 2, Asp, Glu, Lys, Arg and their complexes obtained from computational study (B3LYP/6-31G).

| System        | E (2) (au)     | E (amino acid) (au) | E (complex) (au) | E <sub>s</sub> <sup>#</sup> (kcal/mol) |
|---------------|----------------|---------------------|------------------|----------------------------------------|
| 2–Asp complex | -7857.13125582 | -512.132161309      | -8369.30584118   | -26.6                                  |
| 2–Glu complex |                | -551.435909807      | -8408.62055166   | -33.5                                  |
| 2–Lys complex |                | -496.863285489      | -8354.02716767   | -20.5                                  |
| 2–Arg complex |                | -606.329549087      | -8463.51109907   | -31.6                                  |

<sup>#</sup>E<sub>s</sub> denotes the complex stabilization energy. E<sub>s</sub> = E (complex) – [E (2) + E (amino acid)].
